# Supplementary material for: Apolipoprotein A-IV-Deficient Mice in 129/SvJ Background Are Susceptible to Obesity and Glucose Intolerance
Source: MDPI journal article supplement (doi:10.3390/nu15224840), 2023-11-20

**Supplemental figures:**

**Figure S 1:** Cumulative locomotor activity was compared between apoA-IV<sup>-/-</sup> and WT mice at week 16. ApoA-IV<sup>-/-</sup> mice exhibited a significant decrease in cumulative locomotor activity at the end of a 24-hour measurement. Values are expressed as means  $\pm$  SEM.  $n = 11$  in WT group,  $n = 7$  in apoA-IV<sup>-/-</sup> group. \*  $p < 0.05$ , compared between the groups.

**Figure S1:**

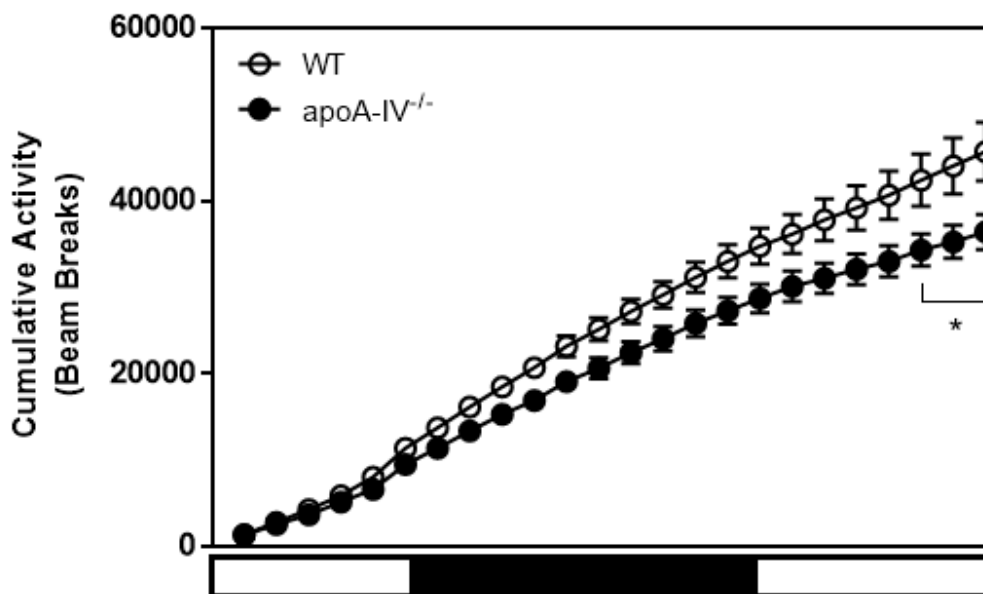

Supplement: s1 [file s1]
