# Supplementary material for: Apolipoprotein A-IV-Deficient Mice in 129/SvJ Background Are Susceptible to Obesity and Glucose Intolerance
Source: Nutrients. 2023 Nov 20;15(22):4840. doi: 10.3390/nu15224840 (PMC10674380; doi:10.3390/nu15224840)
Supplement: Supplementary file 1 [file nutrients-15-04840-s001.zip › Lean mass and fat mass in 129 mice.xlsx]

## Sheet: Sheet1
04/06/2015 (chow diet ~12 weeks old for 129 mice)
04/24/2015 (chow diet ~12 weeks old for 7515,7667,7668)
	WT 129 n=12														AIV KO (129) n=7
body composition (g)
	WT 129	WT 129	WT 129	WT 129	WT 129	WT 129	WT 129	WT 129	WT 129	WT 129	WT 129				AIV KO 129	AIV KO 129	AIV KO 129	AIV KO 129	AIV KO 129	AIV KO 129	AIV KO 129
Rat ID	1	2	3	4	5	7	8	9	10	11	12	AVG	SE		7495	7497	7504	7505	7515	7667	7668	AVG	SE
body weight (g)	21.1	23.7	22.5	21.4	23.4	23.2	21.8	23.8	22.9	24.6	23.4	22.9667	0.308303		31.1	32.2	29	25.2	25.3	29.6	24.4	28.1143	1.1833
fat (g)	1.19	1.475	2.4	1.485	1.46	1.88	1.935	1.055	1.965	2.055	1.995	1.77375	0.1262		7.6	7.465	4.075	3.71	3.13	5.85	3.92	5.10714	0.701383
lean (g)	17.88	19.954	17.865	17.845	19.465	19.02	17.445	20.3	18.61	19.83	18.89	18.8366	0.270357		20.845	21.7	22.335	18.46	20.175	21.51	18.565	20.5129	0.576456
water (g)	16.28	18.17	16.34	16.215	17.61	17.33	15.875	18.365	16.905	18.02	17.2	17.1263	0.238193		18.98	19.58	20.23	16.84	18.355	19.49	16.83	18.615	0.508095
fat percentage	5.63981	6.22363	10.6667	6.93925	6.23932	8.10345	8.87615	4.43277	8.58079	8.35366	8.52564	7.50738	0.536275		24.4373	23.1832	14.0517	14.7222	12.3715	19.7635	16.0656	17.7993	1.77876
lean percentage	84.7393	84.1941	79.4	83.3879	83.1838	81.9828	80.0229	85.2941	81.2664	80.6098	80.7265	82.2552	0.607094		67.0257	67.3913	77.0172	73.254	79.7431	72.6689	76.0861	73.3123	1.81116
05/12/2015 (butter diet for 4 weeks )
06/02/2015 (butter diet for 4 weeks )--7515,7667,7668
	WT 129 n=11														AIV KO (129) n=7
body composition (g)
	WT 129	WT 129	WT 129	WT 129	WT 129	WT 129	WT 129	WT 129	WT 129	WT 129	WT 129				AIV KO 129	AIV KO 129	AIV KO 129	AIV KO 129	AIV KO 129	AIV KO 129	AIV KO 129
Rat ID	1	2	3	4	5	7	8	9	10	11	12	AVG	SE		7495	7497	7504	7505	7515	7667	7668	AVG	SE
body weight (g)	24.4	24.9	28.4	27.4	26.2	26.7	25.7	25.7	25.7	30	27.1	26.5636	0.486223		38.4	40.8	34.3	34.1	31.3	40.3	33.7	36.1286	1.3892
fat (g)	4.11	3.655	8.01	5.67	4.455	5.495	5.015	2.53	4.895	7.585	5.98	5.21818	0.48508		14.28	16.67	9.595	9.975	8.125	15.405	11.775	12.2607	1.22549
lean (g)	19.345	20.45	19.61	20.355	20.1	19.92	19.29	21.64	19.58	20.745	20.15	20.1077	0.207715		22.435	22.975	23.765	22.28	21.695	23.525	20.72	22.485	0.400712
water (g)	17.5	18.485	17.79	18.4	18.115	17.965	17.41	19.52	17.71	18.74	18.25	18.1714	0.184229		20.245	20.675	21.61	20.21	20.665	21.74	19.07	20.6021	0.343253
fat percentage	16.8443	14.6787	28.2042	20.6934	17.0038	20.5805	19.5136	9.84436	19.0467	25.2833	22.0664	19.4327	1.50244		37.1875	40.8578	27.9738	29.2522	25.9585	38.2258	34.9407	33.4852	2.16905
lean percentage	79.2828	82.1285	69.0493	74.2883	76.7176	74.6067	75.0584	84.2023	76.1868	69.15	74.3542	75.9114	1.4135		58.4245	56.3113	69.2857	65.3372	69.3131	58.3747	61.4837	62.6472	2.03144
06/02/2015 (butter diet for 8 weeks )
06/25/2015 (butter diet for 8 weeks )--7515,7667,7668
	WT 129 n=11														AIV KO (129) n=7
body composition (g)
	WT 129	WT 129	WT 129	WT 129	WT 129	WT 129	WT 129	WT 129	WT 129	WT 129	WT 129				AIV KO 129	AIV KO 129	AIV KO 129	AIV KO 129	AIV KO 129	AIV KO 129	AIV KO 129
Rat ID	1	2	3	4	5	7	8	9	10	11	12	AVG	SE		7495	7497	7504	7505	7515	7667	7668	AVG	SE
body weight (g)	26.9	26.1	31.5	31.3	27.7	27.8	27.6	26.5	27.3	31.2	29.7	28.5091	0.612514		41.8	44.6	37.3	36	31.1	40.7	36.1	38.2286	1.69477
fat (g)	5.55	4.214	9.54	8.295	4.975	5.59	5.87	2.89	5.22	8.135	6.965	6.11309	0.588185		16.45	18.535	10.955	10.995	7.82	14.29	12.49	13.0764	1.37543
lean (g)	19.695	19.75	20.12	21.425	20.99	20.355	20.405	21.825	20.485	20.92	20.43	20.5818	0.198728		23.935	24.12	24.57	23.22	22.375	23.33	21.74	23.3271	0.377331
water (g)	18.255	18.02	18.285	19.485	18.985	18.485	18.545	19.715	18.57	18.9	18.485	18.7027	0.157642		21.69	21.76	22.315	20.99	20.28	21.04	19.605	21.0971	0.35129
fat percentage	20.632	16.1456	30.2857	26.5016	17.9603	20.1079	21.2681	10.9057	19.1209	26.0737	23.4512	21.1321	1.61607		39.3541	41.5583	29.37	30.5417	25.1447	35.1106	34.5983	33.6682	2.17359
lean percentage	73.2156	75.6705	63.873	68.4505	75.7762	73.2194	73.9312	82.3585	75.0366	67.0513	68.7879	72.4882	1.54266		57.2608	54.0807	65.8713	64.5	71.9453	57.3219	60.2216	61.6002	2.33631
07/02/2015 (butter diet for 12 weeks )
07/23/2015 (butter diet for 12 weeks )--7515,7667,7668
	WT 129 n=11														AIV KO (129) n=7
body composition (g)
	WT 129	WT 129	WT 129	WT 129	WT 129	WT 129	WT 129	WT 129	WT 129	WT 129	WT 129				AIV KO 129	AIV KO 129	AIV KO 129	AIV KO 129	AIV KO 129	AIV KO 129	AIV KO 129
Rat ID	1	2	3	4	5	7	8	9	10	11	12	AVG	SE		7495	7497	7504	7505	7515	7667	7668	AVG	SE
body weight (g)	29.9	28.6	33.4	34.1	30.6	31.7	31.2	30.9	30.3	36	34.4	31.9182	0.679682		44.6	47.5	39.2	40	35	42	41.8	41.4429	1.50963
fat (g)	6.62	4.345	9.485	8.815	5.08	6.875	7.12	4.64	6.825	10.645	10.085	7.32136	0.658143		17.415	19.255	11.75	13.115	9.815	16.115	16.74	14.8864	1.28283
lean (g)	20.81	22.445	21.41	22.48	22.255	21.8	21.335	23.86	21.45	22.375	21.495	21.9741	0.250277		24.55	25.02	25.355	25.35	23.435	24.595	24.075	24.6257	0.26456
water (g)	18.895	20.305	19.35	20.245	20.16	19.71	19.31	21.515	19.395	20.195	19.395	19.8614	0.21818		22.21	22.58	22.96	22.87	21.335	22.345	21.66	22.28	0.228194
fat percentage	22.1405	15.1923	28.3982	25.8504	16.6013	21.6877	22.8205	15.0162	22.5248	29.5694	29.3169	22.6471	1.61617		39.0471	40.5368	29.9745	32.7875	28.0429	38.369	40.0478	35.5437	1.95394
lean percentage	69.5987	78.479	64.1018	65.9238	72.7288	68.7697	68.3814	77.2168	70.7921	62.1528	62.4855	69.1482	1.64542		55.0448	52.6737	64.6811	63.375	66.9571	58.5595	57.5957	59.841	1.99769
07/30/2015 (butter diet for 16 weeks )
08/20/2015 (butter diet for 16 weeks )--7515,7667,7668
	WT 129 n=11														AIV KO (129) n=7
body composition (g)
	WT 129	WT 129	WT 129	WT 129	WT 129	WT 129	WT 129	WT 129	WT 129	WT 129	WT 129				AIV KO 129	AIV KO 129	AIV KO 129	AIV KO 129	AIV KO 129	AIV KO 129	AIV KO 129
Rat ID	1	2	3	4	5	7	8	9	10	11	12	AVG	SE		7495	7497	7504	7505	7515	7667	7668	AVG	SE
body weight (g)	31.4	29.3	35.1	34.9	31.7	31.9	31.3	33	30.3	36.2	35.1	32.7455	0.682824		48.4	50	47.3	43.3	37.3	48.9	46.1	45.9	1.65314
fat (g)	7.755	4.735	10.575	8.625	6.625	7.555	7.395	6.36	7.29	10.955	10.63	8.04545	0.59556		20.895	21	13.47	15.06	11.49	20.935	19.53	17.4829	1.52759
lean (g)	21.58	22.28	22.63	23.945	22.61	22.355	21.825	24.35	20.99	23.08	22.4	22.5495	0.294039		25.805	26.715	26.545	25.765	24.62	25.91	25.09	25.7786	0.280259
water (g)	19.475	20.11	20.37	21.64	20.45	20.18	19.65	21.955	18.92	20.905	20.295	20.3591	0.268797		23.255	24.025	23.96	23.225	22.77	23.61	22.755	23.3714	0.195618
fat percentage	24.6975	16.1604	30.1282	24.7135	20.8991	23.6834	23.6262	19.2727	24.0594	30.2624	30.2849	24.3443	1.38048		43.1715	42	28.4778	34.7806	30.8043	42.8119	42.3644	37.7729	2.37748
lean percentage	68.7261	76.041	64.4729	68.6103	71.3249	70.0784	69.7284	73.7879	69.2739	63.7569	63.8177	69.0562	1.18592		53.3161	53.43	56.1205	59.5035	66.0054	52.9857	54.4252	56.5409	1.79763
Week	WT	Fat mass percentage (%)											Week	KO	Fat mass percentage (%)
0	5.63981	6.22363	10.6667	6.93925	6.23932	8.10345	8.87615	4.43277	8.58079	8.35366	8.52564		0	24.4373	23.1832	14.0517	14.7222	12.3715	19.7635	16.0656
4	16.8443	14.6787	28.2042	20.6934	17.0038	20.5805	19.5136	9.84436	19.0467	25.2833	22.0664		4	37.1875	40.8578	27.9738	29.2522	25.9585	38.2258	34.9406
8	20.632	16.1456	30.2857	26.5016	17.9603	20.1079	21.2681	10.9057	19.1209	26.0737	23.4512		8	39.3541	41.5583	29.37	30.5417	25.1447	35.1106	34.5983
12	22.1405	15.1923	28.3982	25.8504	16.6013	21.6877	22.8205	15.0162	22.5248	29.5694	29.3169		12	39.0471	40.5368	29.9745	32.7875	28.0429	38.3691	40.0478
16	24.6974	16.1604	30.1282	24.7135	20.899	23.6834	23.6262	19.2727	24.0594	30.2624	30.2849		16	43.1715	42	28.4778	34.7806	30.8043	42.8119	42.3644
Week	WT	Lean mass percentage (%)											Week	KO	Lean mass percentage (%)
0	84.7393	84.1941	79.4	83.3879	83.1838	81.9828	80.0229	85.2941	81.2664	80.6098	80.7265		0	67.0257	67.3913	77.0172	73.254	79.7431	72.6689	76.0861
4	79.2828	82.1285	69.0493	74.2883	76.7176	74.6067	75.0584	84.2023	76.1868	69.15	74.3542		4	58.4245	56.3113	69.2857	65.3372	69.3131	58.3747	61.4837
8	73.2156	75.6705	63.873	68.4505	75.7762	73.2194	73.9312	82.3585	75.0366	67.0513	68.7879		8	57.2608	54.0807	65.8713	64.5	71.9453	57.3219	60.2216
12	69.5987	78.479	64.1018	65.9237	72.7288	68.7697	68.3814	77.2168	70.7921	62.1528	62.4855		12	55.0448	52.6737	64.6811	63.375	66.9571	58.5595	57.5957
16	68.7261	76.041	64.4729	68.6103	71.3249	70.0784	69.7284	73.7879	69.2739	63.7569	63.8177		16	53.3161	53.43	56.1205	59.5035	66.0054	52.9857	54.4252
